# Supplementary material for: Nucleic Acid-Based Diagnostic Tests for the Detection SARS-CoV-2: An Update
Source: Diagnostics (Basel). 2021 Jan 1;11(1):53. doi: 10.3390/diagnostics11010053 (PMC7823986; doi:10.3390/diagnostics11010053)
Supplement: Supplementary file 1 [file diagnostics-11-00053-s001.xlsx]

## Sheet: Sheet1
Date EUA Original Issued	Test Developer	Name of Test	Commercial	Authorized Setting	Target Gene(s) for SARS-CoV-2	Limit of Detection (LoD)	Product LoD (NDU/ml)*	Time to results**	Specimen Indicated for Testing	Recommended RT-PCR Instrument (analysis software) or Detection Instrument	Criteria for Positive Interpretation of SARS-CoV-2	Remarks	Reference
Real-time RT-PCR
2020-01-10	UMass Memorial Medical Center	UMass Molecular Virology Laboratory 2019-nCoV rRT-PCR Dx Panel	No	H	N1, N2	8 copies/µL	N/A	N/A	Nasal, mid-turbinate nasal, NP and OP swab, NP aspirate, and BAL specimens	BioRAD CFX96 Touch Real-Time PCR Detection System	Positive for both of the target genes		https://www.fda.gov/media/142692/download
2020-01-10	Tempus Labs, Inc.	iC SARS-CoV2 Test	No	H	Orf1ab, S, N	250 copies/mL	N/A	2-4 hours	Upper respiratory tract specimens (including NP, anterior nares (AN or nasal), midturbinate nasal, and OP swab specimens)	Applied Biosystem QuantStudio 7 Flex 384 instrument (software version 1.3)	Positive for two or more of the target genes		https://www.fda.gov/media/142596/download
09/30/2020	Aeon Global Health	Aeon Global Health SARS-CoV-2 Assay	No	H	Orf1ab, S, N	0.25 copies/µL	N/A	2-4 hours	Nasal, mid-turbinate, NP, and OP swab specimens, NP wash/aspirate or nasal aspirate specimens, and BAL specimens	Applied Biosystems QuantStudio 12K Flex Real-Time PCR System (QuantStudio 12K Software v1.3)	Positive for two or more of the target genes		https://www.fda.gov/media/142535/download
09/29/2020	CENTOGENE US, LLC	CentoSure SARS-CoV-2 RT-PCR Assay	No	H	N1, N2	2 viral copies/µL	N/A	2-4 hours	Dry OP swab specimens	LightCycler 480 II is using Software Version 1.5.1.62 or higher	Positive for both of the target genes		https://www.fda.gov/media/142539/download
09/29/2020	Akron Children’s Hospital	Akron Children’s Hospital SARS-CoV-2 Assay	No	H	S, E	1250 copies/mL	N/A	2-4 hours	NPl swabs, OP swabs, anterior nasal swabs, mid-turbinate nasal swabs, nasal aspirates, nasal washes and BAL fluid specimens	QIAGEN RotorGene Q MDx PCR instrument (Software V2.1.0.9)	Positive for S with or without E	E gene is specific for lineage B-β-coronaviruses	https://www.fda.gov/media/142543/download
09/25/2020	Genetrack Biolabs, Inc.	Genetrack SARS-CoV-2 Molecular Assay	No	H	N1, N2	1 GC/µL	N/A	2-4 hours	Anterior nasal swab specimens	Applied Biosystems QuantStudio 6 Pro Real-Time PCR System equipped with software v2.4.1	Positive for both of the target genes		https://www.fda.gov/media/142482/download
09/22/2020	Quadrant Biosciences Inc.	Clarifi COVID-19 Test Kit	Yes	H	2 regions of RdRp	1 copy/µL	N/A	2-4 hours	Saliva swab specimens	BioRad-CFX96 Touch Real Time Detection System, BioRad-CFX384 Touch Real Time Detection System, QuantStudio 5	Positive for SARS-CoV-2 HEX	The detection of SARS-CoV-2 RNA is performed using two target regions, which are both detected in the same fluorescence channel (HEX)	https://www.fda.gov/media/142379/download
09/22/2020	Vela Operations Singapore Pte. Ltd.	ViroKey SARS-CoV-2 RT-PCR Test v2.0	Yes	H	Orf1a, N	200 GE/mL	N/A	2-4 hours	NP swabs, OP swabs, anterior nasal swabs, mid-turbinate nasal swabs, nasal or NP aspirates, nasal washes and BAL samples	Applied Biosystems® 7500 Fast Dx Real-Time PCR System or the Sentosa® SA201 Real-Time PCR Instrument	Positive for one or both of the target genes		https://www.fda.gov/media/142383/download
09/21/2020	KimForest Enterprise Co., Ltd.	KimForest SARS-CoV-2 Detection Kit v1	Yes	H	RdRp	200 copies/mL	N/A	2-4 hours	NP/OP swabs, anterior/mid-turbinate nasal swabs, NP washes/aspirates or nasal aspirates, and BAL specimens	NR	Positive for RdRp		https://www.fda.gov/media/142363/download
09/18/2020	Infinity BiologiX LLC	Infinity BiologiX TaqPath SARS-CoV-2 Assay	No	H	Orf1ab, S, N	200 copies/mL	N/A	N/A	OP swab, NP swab, anterior nasal swab, mid-turbinate nasal swab, and BAL fluid	ThermoFisher Applied Biosystems QuantStudio 5 Real-Time PCR System equipped with software v1.3, or the Applied Biosystems ViiA7 Real-Time PCR System with the Applied Biosystems QuantStudio 5 software v1.3	Positive for two or more of the target genes		https://www.fda.gov/media/137776/download
09/18/2020	GK Pharmaceuticals Contract Manufacturing Operations	GK ACCU-RIGHT SARS-CoV-2 RT-PCR KIT	Yes	H	N1, N2	2 copies/µL	N/A	2-4 hours	Upper respiratory specimens (such as NP, OP, mid-turbinate, and nasal swabs)	Applied Biosystems™ 7500 Fast Dx Real-Time PCR Instrument with SDS software version 1.4	Positive for one or both of the target genes		https://www.fda.gov/media/142310/download
2020-09-09	Beijing Wantai Biological Pharmacy Enterprise Co., Ltd.	Wantai SARS-CoV-2 RT-PCR Kit	Yes	H	Orf1ab, N	50 copies/mL	N/A	2-4 hours	OP swab specimen	BIO-RAD CFX-96 (Bio-Rad CFX Manager 3.1), ABI7500 (software v2.3)	Positive for both of the target genes		https://www.fda.gov/media/141997/download
2020-08-09	Verily Life Sciences	Verily COVID-19 RT-PCR Test	No	H	Orf1ab, S, N	60 GCE/mL	N/A	2-4 hours	Upper respiratory specimens (such as nasal, mid-turbinate, NP, and OP swab specimens)	7500 Dx Fast Real-Time PCR with SDS Software v1.4.1 or QuantStudio 5 Real-Time PCR Instrument 384-well block with QuantStudio Design and Analysis Desktop Software v1.5.1	Positive for two or more of the target genes		https://www.fda.gov/media/141951/download
2020-02-09	Bioeksen R&D Technologies Ltd.	Bio-Speedy Direct RT-qPCR SARS-CoV-2	Yes	H	Orf1ab	200 copies/mL (NP aspirate); 281 copies/mL (BAL); 562 copies/mL (OP); 89 copies/mL (NP)	N/A	2-4 hours	NP swabs, OP swabs, combined NP/OP swabs, anterior nasal swabs, mid-turbinate nasal swabs, nasal or NP aspirates, nasal washes and BAL samples	Roche LightCycler® 96, Bio-Rad CFX96 Touch™, Qiagen Rotor-Gene® 5 Plex Real-Time PCR Systems	Positive for Orf1ab		https://www.fda.gov/media/141823/download
2020-01-09	OPTOLANE Technologies, Inc.	Kaira 2019-nCoV Detection Kit	Yes	H	RdRp, E	2500 copies/mL (E); 5000 copies/mL (RdRp)	N/A	2-4 hours	NP, OP, anterior nasal, and mid-turbinate nasal swab specimens, as well as NP wash/aspirate, nasal aspirate, sputum and BAL specimens	QuantStudio 5 Real-Time PCR system (Thermo-Fisher Scientific; Software ver. 1.5.1), ABI 7500 Real-Time PCR system (Applied Biosystems co.; Software ver. 2.3), or CFX96 Dx System (Bio-Rad Laboratories; Software ver. 3.1.1517.0823)	Positive for RdRp with or without E		https://www.fda.gov/media/141795/download
08/31/2020	MiraDx	MiraDx SARS-CoV-2 RT-PCR assay	No	H	N1, N2	4 copies/µL	N/A	2-4 hours	Upper respiratory specimens (such as nasal, mid-turbinate, NP, OP swab specimens and NP wash/aspirate or nasal aspirate specimens)	Applied Biosystems QuantStudio 6 Flex PCR Instrument	Positive for one or both of the target genes		https://www.fda.gov/media/141760/download
08/28/2020	Patients Choice Laboratories, LLC	PCL SARS-CoV-2 Real-Time RT-PCR Assay	No	H	Orf1ab, S, N	100 copies/µL	5400	N/A	NP and OP swabs	Applied Biosystems QuantStudio 12K Flex ( QuantStudio 12K Flex Gene Expression software v1.4)	Positive for two or more of the target genes		https://www.fda.gov/media/141665/download
08/26/2020	Cuur Diagnostics	Cuur Diagnostics SARS-CoV-2 Molecular Assay	No	H	Orf1ab, S, N	25 copies/µL	N/A	N/A	Upper respiratory specimens (such as NP, OP, mid-turbinate, and nasal swab)	Applied Biosystems QuantStudio 12K Flex ( QuantStudio 12K Flex Gene Expression software v1.4)	Positive for two or more of the target genes		https://www.fda.gov/media/141627/download
08/25/2020	Fluidigm Corporation	Advanta Dx SARS-CoV-2 RT-PCR Assay	Yes	H	N1, N2	6.25 GE/µL	54000	2-4 hours	Saliva specimens	Biomark HD system with Data Collection software v4.5.2	Positive for one or both of the target genes		https://www.fda.gov/media/141541/download
08/21/2020	DxTerity Diagnostics, Inc.	DxTerity SARS-CoV-2 RT-PCR Test	No	H	Orf1ab, S, N	50 copies/mL	N/A	2-4 hours	Saliva specimens	Thermo Fisher Applied Biosystems ViiA 7 Real-Time PCR amplification system (QuantStudio5 software v1.3)	Positive for two or more of the target genes		https://www.fda.gov/media/141491/download
08/21/2020	Texas Department of State Health Services, Laboratory Services Section	Texas Department of State Health Services (DSHS) SARS-CoV-2 Assay	No	H	Orf1ab, N	20 copies/mL	N/A	2-4 hours	NP swabs, OP swabs, anterior nasal swabs, mid-turbinate nasal swabs, nasal aspirates, nasal washes and BAL fluid specimens	PerkinElmer Chemagic 360 (software version 6.3.0.3), ThermoFisher Applied Biosystems 7500 Fast Dx Real-Time PCR System (software version 1.4)	Positive for one or both of the target genes		https://www.fda.gov/media/141496/download
08/17/2020	ZhuHai Sinochips Bioscience Co., Ltd.	COVID-19 Nucleic Acid RT-PCR Test Kit	Yes	H	Orf1ab, N	2 copies/µL	5400	2-4 hours	Upper respiratory specimens (such as nasal, mid-turbinate, NP, OP swab specimens and NP wash/aspirate or nasal aspirate specimens)	Applied BiosystemsTM ABI 7500 Real-Time PCR system (Software v2.3) or Applied BiosystemsTM 7500 Fast Dx Real-Time PCR Instrument (Software v1.4.1)	Positive for both of the target genes		https://www.fda.gov/media/141246/download
08/15/2020	Yale School of Public Health, Department of Epidemiology of Microbial Diseases	SalivaDirect	No	H	N1	6 copies/µL	18000	N/A	Saliva specimens	CFX96 Touch Real-Time PCR Detection System, Applied Biosystems 7500 Fast Real-Time PCR System, Applied Biosystems 7500 Fast Dx Real-Time PCR System	Positive for N1		https://www.fda.gov/media/141192/download
2020-11-08	Biomeme, Inc.	Biomeme SARS-CoV-2 Real-Time RT-PCR Test	Yes	H	Orf1ab, S	1.8 GE/µL	N/A	2-4 hours	NP, nasal, and OP swab specimens, and NP wash/aspirate or nasal aspirate specimens	Biomeme’s portable Franklin™ Real-Time PCR Thermocycler, Bio-Rad CFX96 or QuantStudio5	Positive for S with or without Orf1ab		https://www.fda.gov/media/141052/download
2020-10-08	Solaris Diagnostics	Solaris Multiplex SARS-CoV-2 Assay	No	H	N1, N2	10 copies/µL	N/A	2-4 hours	Respiratory specimens (NP swabs, anterior nasal swabs, mid-turbinate nasal swabs, OP swabs, NP wash/aspirates, nasal aspirates, BAL specimens)	Applied Biosystems QuantStudio 5 (Software version v1.5.1)	Positive for both of the target genes		https://www.fda.gov/media/141016/download
2020-10-08	Alpha Genomix Laboratories	Alpha Genomix TaqPath SARS-CoV-2 Combo Assay	No	H	Of1ab, S, N	4 copies/µL	N/A	2-4 hours	NP, OP, anterior nasal, and mid-turbinate nasal swab specimens	QuantStudio 12K Flex Real-Time PCR System (Software version 2.4.0)	Positive for two or more of the target genes		https://www.fda.gov/media/141021/download
2020-07-08	George Washington University Public Health Laboratory	GWU SARS-CoV-2 RT-PCR Test	No	H	N1, N2	12.5 copies/µL	N/A	2-4 hours	Upper respiratory specimens (such as nasal, mid-turbinate, NP and OP swabs) and BAL	LightCycler 480 instrument (Software version 1.5)	Positive for both of the target genes		https://www.fda.gov/media/140980/download
2020-05-08	Vela Operations Singapore Pte Ltd	ViroKey SARS-CoV-2 RT-PCR Test	Yes	H	Orf1a, RdRp	560 GE/mL	N/A	2-4hours	Upper respiratory specimens (such as nasal, mid-turbinate, NP, OP swab specimens and nasopharyngeal wash/aspirate or nasal aspirate specimens)	Applied Biosystems® 7500 Fast Dx Real-Time PCR System or the Sentosa® SA201 Real-Time PCR Instrument	Positive for one or both of the target genes		https://www.fda.gov/media/140922/download
2020-03-08	Wren Laboratories LLC	Wren Laboratories COVID-19 PCR Test	No	H	N1, N3	10 copies/µL	N/A	2-4 hours	NP, OP, anterior nasal, and mid-turbinate nasal swabs, as well as NP washes/aspirates or nasal aspirates, and BAL specimens	Applied Biosystems QuantStudio 7-Flex Real-Time PCR Instrument (QuantStudio Real-Time PCR software v1.3)	Positive for N1 with or without N3	N3 target is specific to Sarbecovirus/SARS-like coronaviruses	https://www.fda.gov/media/140776/download
2020-03-08	Cleveland Clinic Robert J. Tomsich Pathology and Laboratory Medicine Institute	Cleveland Clinic SARS-CoV-2 Assay	No	H	E, RdRp	10 copies/µL	N/A	2-4 hours	NP, OP and nasal swabs and BAL, tracheal aspirate (TASP), and sputum	Roche LightCycler 480 and/or cobas z 480 instruments (software version v1.2.1.62 SP3)	Positive for both of the target genes		https://www.fda.gov/media/140788/download
2020-03-08	ISPM Labs, LLC dba Capstone Healthcare	Genus SARS-CoV-2 Assay	No	H	N1, N2	40 copies/µL	N/A	N/A	NP and OP swabs	Applied Biosystems QuantStudio 12K Flex Real Time PCR Instrument (QuantStudio RealTime PCR System software version 1.3)	Positive for both of the target genes		https://www.fda.gov/media/140818/download
07/31/2020	Xiamen Zeesan Biotech Co., Ltd.	SARS-CoV-2 Test Kit (Real-time PCR)	Yes	H	Orf1ab, N	200 copies/mL	N/A	2-4 hours	NP/OP swabs, anterior/mid-turbinate nasal swabs, NP washes/aspirates or nasal aspirates, and BAL specimens	Applied Biosystems™ QuantStudio 3 real-time PCR thermal cycler (QuantStudioTM Design & Analysis Software v1.4.3)	Positive for both of the target genes		https://www.fda.gov/media/140717/download
07/30/2020	Clinical Reference Laboratory, Inc	CRL Rapid Response	No	H	RdRp	0.25 viral copies/µL	5400	N/A	Saliva specimens	BioRad CFX-96 TOUCH Thermal Cycler instrument (CFX Manager 3.1 software)	Positive for RdRp		https://www.fda.gov/media/140661/download
07/27/2020	Eli Lilly and Company	Lilly SARS-CoV-2 Assay	Yes	H	N1, N1	103 copies of packaged viral RNA/mL	18000	2-4 hours	NP swabs, OP swabs, anterior nasal swabs, mid-turbinate nasal swabs, nasal aspirates, nasal washes and BAL fluid	Applied Biosystems QuantStudio 7 Flex Real-Time PCR System (software v1.3), Applied Biosystems QuantStudio Dx Real-Time PCR System (software v1.0.3), Applied Biosystems QuantStudio 12K Flex RealTime PCR System (software v1.3)	Positive for one or both of the target genes		https://www.fda.gov/media/140543/download
07/27/2020	Sandia National Laboratories	SNL-NM 2019 nCoV Real-Time RT-PCR Diagnostic Assay	No	H	N1, N2	6.25 copies/µL	N/A	2 hours	Upper respiratory specimens (including NP swab, anterior nasal swab, mid-turbinate nasal swab and OP swab, nasal washes, nasal aspirates) and BAL specimens	Applied Biosystems 7500 (ABI7500) (7500 Software v2.3), Applied Biosystems Quant Studio 5 (Software v1.5.1), Bio-Rad CFX Connect (CFX Manager v3.1), or Bio-Rad CFX 96 Real PCR instruments (CFX Maestro 1.1 V4.1.2433.1219)	Positive for both of the target genes		https://www.fda.gov/media/140547/download
07/24/2020	Jiangsu CoWin Biotech Co., Ltd.	Novel Coronavirus (SARS-CoV-2) Fast Nucleic Acid Detection Kit (PCR-Fluorescence Probing)	Yes	H	Orf1ab, N	300 copies/mL	N/A	2 hours	OP swab	Applied Biosystems™ 7500 Real-time PCR System	Positive for both of the target genes		https://www.fda.gov/media/140425/download
07/23/2020	Helix OpCo LLC (dba Helix)	Helix COVID-19 Test	No	H	Orf1ab, S, N	1000 GCE/mL	1800	2 hours	Upper respiratory specimens (NP swabs, OP swab, mid-turbinate nasal swabs and anterior nasal swabs)	QuantStudio 7 Flex Quantitative Real Time PCR Instrument (Software v2.4)	Positive for two or more of the target genes		https://www.fda.gov/media/140420/download
07/21/2020	DiaCarta, Inc.	QuantiVirus SARS-CoV-2 Multiplex Test Kit	Yes	H	Orf1ab	100 copies/mL (QS5, CFX384), 50 copies/mL (ABI 7500 Fast Dx)	600	2 hours	Upper respiratory specimens (such as nasal, NP and OP swab specimens) and sputum	Applied Biosystems™ QuantStudio 5 Real-Time PCR Instrument (QuantStudio™ Design and Analysis Software v1.4), ABI 7500 Fast DX (SDS Software v1.4) and Bio-Rad CXF 384 Real-Time PCR Instrument (Bio-Rad CFX Manager v3.1)	Positive for Orf1ab		https://www.fda.gov/media/140354/download
07/17/2020	Access Genetics, LLC	OraRisk COVID-19 RT-PCR	No	H	RdRp	15 copies/µL	N/A	2 hours	NP swab and nasal swab specimens	LightCycler 480 II instrument (Software version 1.5.1.62)	Positive for RdRp		https://www.fda.gov/media/140293/download
07/16/2020	Boston Heart Diagnostics	Boston Heart COVID-19 RT-PCR Test	No	H	Orf1ab, S, N	250 copies/mL	5400	2 hours	Upper respiratory specimens (such as nasal, mid-turbinate, NP and OP swab specimens), NP aspirate and BAL specimens	QuantStudio 12K Flex Real-Time PCR System (Software version 1.4)	Positive for two or more of the target genes		https://www.fda.gov/media/140259/download
07/13/2020	KogeneBiotech Co., Ltd.	PowerChek 2019-nCoV Real-time PCR Kit	Yes	H	E, RdRP	4 copies/µL	5400	2-4 hours	Anterior/mid-turbinate nasal swabs, NP/OP swabs, nasopharyngeal washes/aspirates or nasal aspirates, BAL, and sputum	Applied Biosystems™ 7500 Real-time PCR System, Applied Biosystems™ 7500 fast System run as a standard AB 7500, CFX96™ Real-time PCR Detection System	Positive for RdRP with or without E	E gene is specific for Sarbecovirus	https://www.fda.gov/media/140069/download
07/13/2020	Trax Management Services Inc.	PhoenixDx SARS-CoV-2 Multiplex	Yes	H	Orf1ab, N	50 copies/µL	N/A	2-4 hours	Upper respiratory specimens (such as nasal, mid-turbinate, NP and OP swabs) and BAL specimens	Thermo Fisher QS1, Qiagen Rotor-Gene Q, Applied Biosystems ABI 7500 Fast Real time PCR Dx, DNA Technologie DTPrime5, and Analytik Jena qTower3G platforms	Positive for SARS-CoV-2 FAM	The detection of SARS-CoV-2 RNA is performed using two target regions, which are both detected in the same fluorescence channel (FAM)	https://www.fda.gov/media/140073/download
07/13/2020	Compass Laboratory Services, LLC	Compass Laboratory Services SARS-CoV2 Assay	No	H	Orf1ab	5 copies/µL	N/A	2-4 hours	Upper respiratory specimens (NP swabs, OP swab, mid-turbinate nasal swabs, anterior nasal swabs, NP wash/aspirate or nasal aspirate)	QuantStudio 12K Flex (software v1.3) and QuantStudio 7 Flex Quantitative Real Time PCR Instruments (Software v1.3)	Positive for Orf1ab		https://www.fda.gov/media/140078/download
2020-10-07	Boston Medical Center	BMC-CReM COVID-19 Test	No	H	N1, N2	10 gene copies/µL (Two-Step Singleplex Test), 1 gene copy/µL (One-Step Singleplex Test)	600000	2 hours	NP, OP, anterior nasal and mid-turbinate nasal swabs, NP washes/aspirates or nasal aspirates, and BAL specimens	QuantStudio 6 Flex Real-Time PCR System (software version 1.3)	Positive for one or both of the target genes		https://www.fda.gov/media/140007/download
2020-09-07	BioSewoom, Inc.	Real-Q 2019-nCoV Detection Kit	Yes	H	E, RdRP	6.25 copies/µL (sputum), 6.25 copies/µL (NP swab using ABI7500, QS5, CFX96), 3.125 copies/µL (NP swab using ABI7500 fast and CFX96)	N/A	N/A	NP swab, NP aspirates, nasal mid-turbinate swab, nasal swab, OP swab, sputum, tracheal aspirates and BAL specimens	Applied Biosystems 7500 real-time PCR instrument (7500 Software v2.3), Applied Biosystems 7500 fast real-time PCR instrument (7500 Software v2.3), Applied Biosystems QuantStudio 5 real-time PCR Instrument (QuantStudio™ Design and Analysis Software v1.4), CFX96 real-time PCR detection system (CFX Manager™ Software v1.6), CFX96 DX real-time PCR detection system (CFX Manager™ Software v1.6)	Positive for RdRP with or without E		https://www.fda.gov/media/139941/download
2020-08-07	Clinical Research Sequencing Platform (CRSP), LLC at the Broad Institute of MIT and Harvard	CRSP SARS-CoV-2 Real-time Reverse Transcriptase (RT)-PCR Diagnostic Assay	No	H	Assay version 1: N1, N2 Assay version 2: N2	Assay version 1: 4.0 x 103 copies/mL Assay version 2: 1.6 x 103 copies/mL	N/A	~2 Hours	Upper respiratory specimens (such as NP, OP, nasal, and mid-turbinate swabs, NP wash/aspirate or nasal aspirate specimens) and BAL specimens	Assay version 1: Applied Biosystems Viia7 thermocycler or the Applied Biosystems QuantStudio 7 Flex each with QuantStudio software version 1.3 Assay version 2: Applied Biosystems QuantStudio 7 Flex thermocycler with QuantStudio software version 1.3	Assay version 1: Positive for both N1 and N2 Assay version 2: Positive for N2		https://www.fda.gov/media/139858/download
2020-07-07	Enzo Life Sciences, Inc.	AMPIPROBE SARS-CoV-2 Test System	Yes	H	N1, N2	280 copies/mL	18000	2-4 hours	Upper respiratory specimens (such as nasal, mid-turbinate, NP, OP swab specimens and NP wash/aspirate or nasal aspirate specimens)	Applied Biosystems QuantStudio® 5 (QS5) instrument (Software version 1.5.1)	Positive for both N1 and N2		https://www.fda.gov/media/139828/download
2020-07-07	Access Bio, Inc.	CareStartTM COVID-19 MDx RT-PCR	Yes	H	N, RdRP	10 copies/reaction	5400	2-4 hours	Upper respiratory specimens (such as NP, OP and nasal swabs, and NP wash/aspirate or nasal aspirate) and BAL	Applied Biosystems™ 7500/7500 Fast Real-Time PCR Instrument (SDS Software v1.4. 21 CFR Part 11 Module), CFX96 Touch™ Real-Time PCR Detection System (CFX Manager™ Software v3.1)	Positive for one or both of the target genes		https://www.fda.gov/media/139832/download
2020-07-07	Gene By Gene	Gene By Gene SARS-CoV-2 Detection Test	No	H	N1, N2	6.25 copies/µL	N/A	2-4 hours	Nasal swabs and NP swabs	Bio-Rad CFX384 Touch Real-Time PCR Detection System (Bio-Rad CFX Maestro Software )	Positive for both N1 and N2		https://www.fda.gov/media/139836/download
2020-06-07	Laboratorio Clinico Toledo	Laboratorio Clinico Toledo SARS-CoV-2 Assay	No	H	E, N, RdRP	203 copies/mL (RdRp and E); 21000 copies/mL (N)	N/A	2-4 hours	Upper respiratory specimens (such as nasal, mid-turbinate, NP, and OP swab specimens) and BAL specimens	Roche Light Cycler 480 (software version LCS480 1.5.16.2 SP@-UDF v 2.0)	Positive for RdRp, N and E or RdRP with/without N or E		https://www.fda.gov/media/139788/download
2020-02-07	Centers for Disease Control and Prevention (CDC)	Influenza SARS-CoV-2 (Flu SC2) Multiplex Assay	Yes	H	N	1.01×10-2 TCID50/mL (TaqPath 1-step Multiplex); 5.06×10-2 TCID50/mL (Ultraplex 1-step ToughMix)	5700	2-4 hours	Upper or lower respiratory specimens (such as NP, OP and nasal swabs, sputum, lower respiratory tract aspirates, BAL, and NP wash/aspirate or nasal aspirate)	Applied Biosystems 7500 Fast Dx Real-Time PCR Instrument (SDS version 1.4.1 software)	Positive for N		https://www.fda.gov/media/139743/download
2020-01-07	Centogene US, LLC	CentoFast-SARS-CoV-2 RT-PCR Assay	No	H	E, RdRP	5 viral copies/µL	N/A	2-4 hours	Dry OP swab	QuantStudio 5 Real-Time PCR System, LightCycler 480 II (Roche) (Software Version 1.5.1.62 or higher)	1st Tier: Positive for E 2nd Tier: Positive for both E and RdRP		https://www.fda.gov/media/139725/download
06/30/2020	Psomagen, Inc.	Psoma COVID-19 RT Test	No	H	N1, N2	1 copy/µL	18000	2 hours	Upper respiratory specimens (such as nasal, mid-turbinate, NP, and OP swab specimens) and BAL specimens	Light cycler 480 instrument (Light Cycler 480 software Version 1.5)	Positive for both N1 and N2		https://www.fda.gov/media/139676/download
06/30/2020	TNS Co., Ltd (Bio TNS)	COVID-19 RT-PCR Peptide Nucleic Acid (PNA) kit	Yes	H	RdRP, N	3.715 copies/µL (RdRp); 2.524 copies/µL (N)	N/A	N/A	NP swabs, OP swabs, anterior nasal swabs, mid-turbinate nasal swabs, BAL, and NP wash/aspirates or nasal aspirates	Bio-Rad CFX-96 real-time PCR detection system	Positive for one or both of the target genes		https://www.fda.gov/media/139680/download
06/29/2020	LifeHope Labs	LifeHope 2019-nCoV Real-Time RT-PCR Diagnostic Panel	No	H	N1, N2	2.5 GE/µL	N/A	~2 hours	Upper respiratory specimens (such as nasal, mid-turbinate, NP, and OP swab specimens) and BAL specimens	QuantStudio 5 (Software version 1.5.1)	Positive for both N1 and N2		https://www.fda.gov/media/139623/download
06/29/2020	Acupath Laboratories, Inc.	Acupath COVID-19 Real-Time (RT-PCR) Assay	No	H	Orf1ab, S, N	25 copies/µL	18000	2 hours	NP swab, NP aspirate, and BAL specimens	Applied Biosystems QuantStudio 12K Flex (QuantStudio software version 1.4)	Positive for two or more of the target genes		https://www.fda.gov/media/139672/download
06/26/2020	Inform Diagnostics, Inc.	Inform Diagnostics SARS-CoV-2 RT-PCR Assay	No	H	N1, N2	20 copies/µL	N/A	1 hour	NP, OP, anterior nasal, and midturbinate nasal swabs, as well as NP wash/aspirate or nasal aspirates, and BAL specimens	7500 Fast Dx Real-Time PCR Instrument ( software version 1.4) or QuantStudio (software version 1.0.3)	Positive for either N1 or N2 or both		https://www.fda.gov/media/139572/download
06/25/2020	Diagnostic Solutions Laboratory, LLC	DSL COVID-19 Assay	No	H	S, N1, N3	10 copies/swab	N/A	2 hours	Upper respiratory specimens (such as nasal, midturbinate, NP, and OP swabs) and BAL specimens	QuantStudio 5 Real-Time PCR System (QS5 Analysis software)	Postitive for N1 and/or S	N3 is a coronavirus generic primer and probe set that can also detect other coronaviruses	https://www.fda.gov/media/139516/download
06/24/2020	University of Texas MD Anderson Cancer Center, Molecular Diagnostics Laboratory	MD Anderson High-throughput SARS-CoV-2 RT-PCR Assay	No	H	N1, N2	5 copies/µL	N/A	1.5 -2 hours	Upper respiratory specimens (such as NP, OP, nasal, and mid-turbinate swabs)	QuantStudio 7 Flex Fast Sequence Detection System (Software V1.3), QuantStudio Dx Real-Time PCR Instrument (Software V1.0.3), Applied Biosystems 7500 Fast Real-Time PCR Instrument (Software V1.4)	Positive for both N1 and N2		https://www.fda.gov/media/139512/download
06/23/2020	HealthQuest Esoterics	HealthQuest Esoterics TaqPath SARS-CoV-2 Assay	No	H	Orf1ab, S, N	20 copies/µL	18000	<3 hours	NP, OP, anterior nasal, and mid-turbinate nasal swabs, as well as NP wash/aspirate or nasal aspirates, and BAL specimens	QuantStudio 12K Flex Real-Time PCR System (software version 1.3)	Positive for one or more of the target genes		https://www.fda.gov/media/139434/download
06/23/2020	University of Alabama at Birmingham Fungal Reference Lab	FRL SARS CoV-2 Test	No	H	N1	125 copies/mL	N/A	<3 hours	NP swab, OP swab, nasal swab, mid-turbinate nasal swab, anterior nasal swab,NP wash/aspirate, nasal aspirate, and BAL specimens	Applied Biosystems QuantStudio 5 Real-Time PCR System (Software v1.4.3)	Positive for N1		https://www.fda.gov/media/139437/download
06/23/2020	Gencurix, Inc	GenePro SARS-CoV-2 Test	Yes	H	Orf1ab, E	5550 GE/mL (Orf1ab) 6,000 GE/mL (E )	N/A	2 hours	NP swab, OP swab, anterior nasal swab, and mid-turbinate swab specimens as well as NP wash/ aspirate, nasal aspirate and BAL specimens	Applied Biosystems™ QuantStudio™ Dx (Software v1.0.3), CFX96™ Dx System (Software v3.1)	Positive for Orf1ab with or without E		https://www.fda.gov/media/139442/download
06/18/2020	Jiangsu Bioperfectus Technologies Co., Ltd.	COVID-19 Coronavirus Real Time PCR Kit	Yes	H	Orf1ab, N	3.5×102 copies/mL	N/A	~2 hours	NP swabs, OP swabs, anterior nasal swabs, mid-turbinate nasal swabs, nasal aspirates, nasal washes, BAL fluid and sputum	Applied Biosystems 7500 (Software V2.3 and V2.4), QuantStudio™ 5 (Software version V1.4.3 and V1.5.1), Roche LightCycler® 480 (Software version V1.5.1.62)	Positive for one or both of the target genes		https://www.fda.gov/media/139279/download
06/18/2020	3B Blackbio Biotech India Ltd., a subsidiary of Kilpest India Ltd.	TRUPCR SARS-CoV-2 Kit	Yes	H	E, N, RdRp	10 copies/µL	N/A	1.5-2 hours	NP and OP swabs, anterior nasal swab and mid-turbinate nasal swabs, NP aspirates/washes or nasal aspirates, and BAL specimens	Applied Biosystem QuantStudio 3 (Software version 1.4.3), Qiagen Rotor-Gene Q 5Plex HRM Platform (software version 2.3.1)	Positive for SARS-CoV-2 FAM	E gene for the detection of the Sarbecovirus (of Genus B-betacoronavirus (B-βCoV))	https://www.fda.gov/media/139296/download
06/17/2020	The Ohio State University Wexner Medical Center	OSUWMC COVID-19 RT-PCR test	No	H	N1, N2	0.25 copies/µL	N/A	30 minutes	Nasal, OP and NP swabs	ABI 7500 Fast Real-time PCR instrument (software version 1.5.1)	Positive for one or both of the target genes		https://www.fda.gov/media/139288/download
2020-12-06	RTA Laboratories Biological Products Pharmaceutical and Machinery Industry	Diagnovital SARS-CoV-2 Real-Time PCR Kit	Yes	H	E, RdRp	38 copies/mL	N/A	N/A	Anterior nasal and mid-turbinate nasal swabs, NP and OP swabs, NP wash/aspirates or nasal aspirates and BAL specimens	BIO-RAD CFX96-IVD (Bio-Rad Laboratories, Inc.) Software version 3.0 and QuantStudio™ 5 Dx, (Applied Biosystems) Software v 1.0	Positive for RdRp with or without E		https://www.fda.gov/media/138928/download
2020-10-06	Tide Laboratories, LLC	DTPM COVID-19 RT-PCR Test	Yes	H	N	22 copies/µL	N/A	25 minutes	NP swabs, OP swabs, nasal swabs, and mid-turbinate swab specimens	ThermoFisher QuantStudio 5 (software version 1.5.1)	Positive for N		https://www.fda.gov/media/138818/download
2020-10-06	TBG Biotechnology Corp.	ExProbe SARS-CoV-2 Testing Kit	Yes	H	E, N, RdRp	10 copies/µL	N/A	~35 minutes	NP and OP swabs, anteri or nasal and mid-turbinate nasal swabs, NP aspirate/wash and nasal aspirate specimens, and BAL specimens	ABI 7500 Real Time PCR System (Software version 2.3)	Positive for RdRp with or without E and N	E and N are for the detection of Sarbecovirus	https://www.fda.gov/media/138822/download
2020-08-06	Euroimmun US, Inc.	EURORealTime SARS-Cov-2	Yes	H	Orf1ab, N	150 copies/mL	1800	1.5 hours	Upper respiratory specimens (such as nasal, mid-turbinate, NP, and OP swabs) and bronchioalveolar lavage (BAL)	LightCycler® 480 II, 7500 Fast Real-Time PCR Instrument, CFX 96 Touch	Positive for SARS-CoV-2 FAM	The detection of SARS-CoV-2 RNA is performed using two target regions, which are both detected in the same fluorescence channel (FAM)	https://www.fda.gov/media/138761/download
2020-05-06	Genetron Health (Beijing) Co., Ltd.	Genetron SARS-CoV-2 RNA Test	Yes	H	Orf1ab, N	1000 copies/mL	N/A	~2.5 hours	Upper respiratory specimens (such as OP, NP, anterior nasal and mid-turbinate nasal swab specimens)	Applied Biosystems 7500 Real-Time PCR System (software version 2.3)	Positive for one or both of the target genes		https://www.fda.gov/media/138685/download
2020-04-06	Phosphorus Diagnostics LLC	Phosphorus COVID-19 RT-qPCR Test	No	H	N1, N2	5 copies/µL	18000	Unavailable	OP swabs, NP swabs, anterior nasal and mid-turbinate nasal swabs, NP washes/aspirates or nasal aspirates as well as BAL specimens	CFX384 Touch Real-Time PCR Detection System ( Software version 3.1)	Positive for both N1 and N2		https://www.fda.gov/media/138654/download
2020-01-06	Gravity Diagnostics, LLC	Gravity Diagnostics COVID-19 Assay	No	H	N1, N2	2.4 copies/µL	18000	2 hours	Nasal, NP and OP swab and BAL specimens	Applied Biosystems QuantStudio7 Flex instrument (software version 1.3) and QuantStudio12 Flex instrument (software version 1.2.2)	Positive for one or both of the target genes		https://www.fda.gov/media/138530/download
05/22/2020	dba SpectronRX	Hymon SARS-CoV-2 Test Kit	Yes	H	E, N	5 copies/µL	N/A	N/A	Upper respiratory specimens (such as nasal, mid-turbinate, NP, and OP swab specimens) and BAL specimens	ABI 7500 Real-Time PCR System	Positive for SARS-CoV-2 FAM		https://www.fda.gov/media/138345/download
05/22/2020	Exact Sciences Laboratories	SARS-CoV-2 (N gene detection) Test	No	H	N1	1.2 copies/µL	6025	N/A	Upper respiratory specimens (such as nasal, mid-turbinate, NP, and OP swab specimens)	ABI 7500 Fast Dx (Software version 1.4.1)	Positive for N1		https://www.fda.gov/media/138328/download
05/21/2020	P23 Labs, LLC.	P23 Labs TaqPath SARS-CoV-2 Assay	No	H	Orf1ab, S, N	10 copies/µL	N/A	Unavailable	OP swabs, NP swabs, anterior nasal and mid-turbinate nasal swabs, NP washes/aspirates or nasal aspirates as well as BAL specimens	ThermoFisher Applied Biosystems QuantStudio 5 Real-Time PCR System (software v1.3 )	Positive for one or more of the target genes		https://www.fda.gov/media/138297/download
05/21/2020	SolGent Co., Ltd	DiaPlexQ Novel Coronavirus (2019-nCoV) Detection Kit	Yes	H	Orf1a, N	200 copies/mL	N/A	~2 hours	NP swabs, OP swabs, anterior nasal swabs, mid-turbinate nasal swabs, nasal aspirates, nasal washes, BAL fluid and sputum	Applied Biosystems™ 7500 Real-Time PCR Instrument System and 7500 Fast Real-Time PCR Instrument System (software V2.0.6), Bio-Rad CFX96™ Real-time PCR Detection System (software V3.1)	Positive for one or both of the target genes		https://www.fda.gov/media/138303/download
05/21/2020	BioCore Co., Ltd.	BioCore 2019-nCoV Real Time PCR Kit	Yes	H	N, RdRP	500 copies/ mL	600	2 hours	Upper respiratory specimens (such as nasal, mid-turbinate, OP, and NP swabs) and lower respiratory specimens (such as sputum, bronchioalveolar lavage (BAL), and tracheal aspirates)	CFX96 Dx System (Bio-Rad Inc.), Applied Biosystems 7500 RealTime PCR Instrument System (Thermo Fisher Scientific Inc.), or SLAN-96P (Shanghai Hongshi Medical Technology Co. Ltd)	Positive for one or both of the target genes		https://www.fda.gov/media/138290/download
05/18/2020	Quidel Corporation	Lyra Direct SARS-CoV-2 Assay	Yes	H	pp1ab	1.28×104 GE/mL	540000	2.4 hours	Nasal, NP, or OP direct swab specimens	Applied Biosystems 7500 Fast Dx (software version 1.4, or later), Applied Biosystems 7500 Standardsoftware version 2.0.6, or later), Roche LightCycler 480 (software version 1.5.0.39, or later), Roche Cobas z480 (software version 1.5.1.62 SP2-, or later), Qiagen Rotor-Gene Q (software version 2.0.2.4, or later), Bio-Rad CFX96 Touch (software version 3.1, or later), Thermofisher QuantStudio 7 Pro (…	Positive for pp1ab		https://www.fda.gov/media/138178/download
05/15/2020	Fulgent Therapeutics, LLC	Fulgent COVID-19 by RT-PCR Test	No	H	N1, N2	5 copies/µL	3600	1-2 days	Upper and lower respiratory specimens (Nasal swabs, NP and OP swabs)	QuantStudio 6 and QuantStudio 7 Real-Time PCR System	Positive for both N1 and N2		https://www.fda.gov/media/138150/download
05/15/2020	Assurance Scientific Laboratories	Assurance SARS-CoV-2 Panel	No	H	N1	5 GC/µL (Abnova); 9 GC/µL (Zymo)	5400	N/A	Nasal swabs, NP and OP swabs	BioRad CFX96 or CFX384	Positive for both N1 and N2		https://www.fda.gov/media/138154/download
05/14/2020	GeneMatrix, Inc.	NeoPlex COVID-19 Detection Kit	Yes	H	N, RdRp	50 copies/reaction	5400	3-4 hours	Upper respiratory specimens (such as NP, OP, mid-turbinate, and nasal swabs) and lower respiratory specimens (such as sputum, tracheal aspirates, and BAL)	Applied Biosystems™ 7500 Fast Dx Real-Time PCR Instrument (software version 1.4)	Positive for one or both of the target genes		https://www.fda.gov/media/138100/download
05/13/2020	Applied DNA Sciences, Inc.	Linea COVID-19 Assay Kit	Yes	H	S1, S2	1.25 copies/µL (TRIzol and QIAamp extraction kits), 0.625 copies/µL (Omega Bio-Tek Mag-Bind Viral RNA Xpress Kit)	2500	1 hour	upper respiratory specimens (such as NP swabs and OP swabs, anterior nasal and mid-turbinate nasal swabs, NP washes/aspirates or nasal aspirates, and BALs	Thermo Fisher Scientific (Applied Biosystems) QuantStudioTM Dx Real-Time PCR system (software v1.0.3) and QuantStudioTM 5 Real-Time PCR system (software v1.4)	Positive for one or both of the target genes		https://www.fda.gov/media/138059/download
2020-11-05	1drop Inc.	1copy COVID-19 qPCR Multi Kit	Yes	H	E, RdRp	200 copies/mL	18000	<2 hours	NP swab, anterior nasal swab, mid-turbinate nasal swab and OP swab as well as NP wash/aspirate and nasal aspirate specimens	Light Cycler 480 (Software version 1.5), Rotor-Gene Q 5plex HRM (Software version 2.3.4), Applied Biosystems Quantstudio5 (Software version 1.4.3), Applied Biosystems 7500 Real-Time PCR Instrument system ( Software version 2.0.6), CFX96™ Real-Time PCR Detection system (Software Bio-Rad CFX Maestro version 1.1)	Positive for RdRp with or without E	E gene is for the detection of Sarbecovirus	https://www.fda.gov/media/137935/download
2020-08-05	Gnomegen LLC	Gnomegen COVID-19-RT-qPCR Detection Kit	Yes	H	N1, N2	10 virus copies/reaction	N/A	3 hours	NP and OP swabs	Applied Biosystems 7500 Fast Dx RealTime PCR Systems (1.4 software)	Positive for both N1 and N2		https://www.fda.gov/media/137895/download
2020-07-05	Zymo Research Corporation	Quick SARS-CoV-2rRT-PCR Kit	Yes	H	Three regions in N	83 GEC/mL	N/A	1.5 hours	Upper respiratory specimens (such as nasal, NP, mid-turbinate or OP swabs), and lower respiratory specimens (such as sputum, tracheal aspirates, and BAL)	Bio-Rad CFX96 Touch Real-Time PCR Detection System ( Bio-Rad CFX Maestro™ 1.1 Version 4.1.2433.1219 software or higher)	Positive for SARS-CoV-2 HEX	The detection of SARS-CoV-2 RNA is performed using three target regions, which are detected in the same fluorescence channel (HEX)	https://www.fda.gov/media/137780/download
2020-06-05	OPTI Medical Systems, Inc.	OPTI SARS-CoV-2 RT PCR Test	Yes	H	N1, N2	0.9 copies/µL (NP swab), 0.7 copies/µL (sputum)	1800	2-3.5 hours	Upper and lower respiratory specimens (such as nasal, NP, OP swabs, sputum, lower respiratory tract aspirates, BAL, and NP wash/aspirate or nasal aspirate)	Applied Biosystems® 7500 FAST (software v2.0.6),Applied Biosystems® QuantStudio 5 ( software v1.5.1), Agilent Mx3005P™ (Software v4.10), Roche LightCycler® 480 (Software v1.5.1), Bio Molecular Systems Mic qPCR (software v2.8.10)	Positive for SARS-CoV-2 FAM	SARS-CoV-2 RNA targets (N1 and N2) are both detected in the FAM channel	https://www.fda.gov/media/137739/download
2020-06-05	BioMérieux SA	SARS-COV-2 R-GENE	Yes	H	PCR1: N, RdRp PCR2: E	380 GC/mL	18000	4-5 hours	NP swabs, OP swabs, anterior nasal swabs, mid-turbinate nasal swabs, nasal aspirates, nasal washes and BAL fluid	Applied Biosystems™ 7500 Fast (software version 2.3) or Fast Dx real-time PCR (software version 1.4), QuantStudio 5 Dx (software version 1.0), LightCycler 480 (software version 1.5), CFX96 ( software Maestro 1.1 ) and Rotor‑Gene Q (software 2.3)	PCR1: Positive for one or both of the target genes	E gene is for the detection of Sarbecovirus	https://www.fda.gov/media/137742/download
2020-05-05	Fast Track Diagnostics Luxembourg S.á.r.l. (a Siemens Healthineers Company)	FTD SARS-CoV-2	Yes	H	Orf1ab, N	0.0023 TCID50/mL	N/A	2-3 hours	Upper respiratory specimens (such as nasal swabs, NP swabs, OP swabs, NP wash/aspirate or nasal aspirate) and BAL	Applied Biosystems® 7500 Real-Time PCR System (ThermoFisher Scientific) and the	Positive for SARS-CoV-2 green channel	Both targets (N gene and ORF1ab) are labeled with the same dye and are detected in the same channel.	https://www.fda.gov/media/137690/download
2020-04-05	Sansure BioTech Inc.	Novel Coronavirus (2019-nCoV) Nucleic Acid Diagnostic Kit (PCR-Fluorescence Probing)	Yes	H	Orf1ab, N	200 copies/mL	N/A	1.15 hours	NP swabs, OP swabs, anterior nasal swabs, midturbinate swabs, nasal washes and nasal aspirates	ABI 7500 Real-Time PCR System	Positive for one or both of the target genes		https://www.fda.gov/media/137651/download
04/29/2020	LabGenomics Co., Ltd.	LabGun COVID-19 RT-PCR Kit	Yes	H	RdRp, E	20 genomic RNA copies/μl	1800	Unavailable	NP or OP, anterior nasal and mid-turbinate nasal swabs, as well as NP wash/aspirate or nasal aspirate specimens and sputum	Applied Biosystems™ 7500 Real-time PCR Instrument system ( software version 2.3) or BioRad CFX96™ Real-time PCR detection system (Bio-Rad CFX Manager 3.1)	Positive for RdRp with or without E		https://www.fda.gov/media/137483/download
04/27/2020	Seasun Biomaterials	U-TOP COVID-19 Detection Kit	Yes	H	2 regions of Orf1ab gene, N	1 copy/µL	600	1.5 Hours	OP and NP swab specimens, anterior nasal and mid-turbinate nasal swabs, NP wash/aspirate or nasal aspirate specimens and sputum	CFX 96 real-time PCR detection system ( software CFX manager V3.1) and Applied Biosystems real-time PCR system 7500 (Software 2.0.6)	Positive for one or both of the target genes		https://www.fda.gov/media/137425/download
04/23/2020	SD Biosensor, Inc	STANDARD M nCoV Real-Time Detection Kit	Yes	H	E, RdRp	0.5 copy/µL (ABI 7500), 0.25 copy/µL for upper respiratory specimens and 0.125 copy/µL for lower respiratory specimens (CFX95), 0.5 copy/µL for upper respiratory specimens and 0.25 copy/µL for lower respiratory specimens (LC480)	N/A	1 hour	NP, OP, and mid-turbinate nasal swab, and sputum specimens	Roche LightCycler® 480 (software version 1.5.1.62), BioRad CFX96™ Dx System (version 3.1) and Applied Biosystems 7500 Real-Time PCR Instrument System (version 2.0.6)	Positive for RdRp with or without E		https://www.fda.gov/media/137302/download
04/22/2020	altona Diagnostics GmbH	RealStar SARS-CoV-2 RT-PCR Kits U.S.	Yes	H	S, E	1.0×10-1 PFU/mL	N/A	N/A	NP swabs, OP swabs, anterior nasal swabs, mid-turbinate nasal swabs, nasal washes and nasal aspirates	BioRad CFX 96 Touch Real-Time PCR (CFX Manager™ Software v3.1) and CFX96 Touch Deep Well Real-Time PCR Detection Systems (CFX Manager™ Software v3.1)	Positive for S with or without E	E gene is specific for lineage B-betacoronavirus	https://www.fda.gov/media/137252/download
04/21/2020	Seegene, Inc.	Allplex 2019-nCoV Assay	Yes	H	E, N, RdRp	4167 copies/mL	N/A	1 hour 50 mins	NP swab, OP swab, anterior nasal swab, midturbinate nasal swab, nasopharyngeal wash/aspirate, nasal aspirate, BAL and sputum specimens	CFX96TM, CFX96 Touch™ (CFX ManagerTM Software V3.1 or CFX MaestroTM Software V1), Applied Biosystems™ 7500 (software v2.0.5), Applied Biosystems™ 7500 Fast Dx real-time PCR detection systems ( software v1.4.1 (Windows XP)/ 1.5.1 (Windows 7 64-bit))	Positive for one or both of the target genes (RdRp and N) with or without E		https://www.fda.gov/media/137178/download
04/20/2020	Trax Management Services Inc.	PhoenixDx 2019-CoV	Yes	H	E, RdRp	100 copies/mL	N/A	1 hour 15 mins	Nasal swabs, NP swabs, OP swabs and BAL specimens	BIO-RAD CFX96-IVD (CFX Manager Software version 3.0), Qiagen Rotor-Gene Q (software 2.3.5 or higher), and ABI 7500 Fast Real time PCR (software version 2.0.4 or higher)	Positive forRdRP with or without E	E gene is for the detection of Sarbecovirus	https://www.fda.gov/media/137153/download
04/18/2020	OSANG Healthcare	GeneFinder COVID-19 Plus RealAmp Kit	Yes	H	E, N, RdRP	0.5 copy/µL	N/A	3 hours	NP, OP, nasal, and mid-turbinate nasal swab specimens, BAL fluid, and sputum	Applied Biosystems® 7500 Real-Time PCR Instrument (ABI 7500) (software version 2.3), Bio-Rad CFX Real-Time PCR Instrument (software version 1.6)	Positive for one or both of the target genes (RdRp and N) with or without E		https://www.fda.gov/media/137116/download
04/17/2020	Fosun Pharma USA Inc.	Fosun COVID-19 RT-PCR Detection Kit	Yes	H	Orf1ab, E, N	300 copies/mL	N/A	1 hour 15 mins	Upper and lower respiratory specimens (such as anterior nasal swabs, mid-turbinate nasal swabs, NP swabs, OP swabs, sputum, lower respiratory tract aspirates, BAL, and NP wash/aspirate or nasal aspirate)	Applied Biosystems™ 7500 Real-Time PCR (software version v1.4 or v1.5)	Positive for two or more of the target genes		https://www.fda.gov/media/137120/download
04/16/2020	KorvaLabs Inc.	Curative-Korva SARS-Cov-2 Assay	No	H	N1, N2	200 copies/mL	18000	N/A	Nasal swabs, NP swabs, OP swabs and oral fluid specimens	BioRad CFX 96 Touch, BioRad CFX Connect Real-Time PCR systems and Roche LightCycler 480 II Real-Time PCR systems	Positive for SARS-CoV-2 N	The detection of SARS-CoV-2 RNA is performed using two target regions, which are both detected in the same fluorescence channel.	https://www.fda.gov/media/137089/download
04/16/2020	GenoSensor, LLC	GSTM COVID-19 Real-Time PCR Kit	Yes	H	Orf1ab, E, N	1 copy/µL	N/A	1.5 hours	Nasal swabs, NP swabs, OP swabs and mid-turbinate swabs	Applied Biosystems™ 7500 Fast Dx Real-Time PCR (software version 1.4)	Positive for two or more of the target genes		https://www.fda.gov/media/137093/download
04/15/2020	Maccura Biotechnology (USA) LLC	SARS-CoV-2 Fluorescent PCR Kit	Yes	H	Orf1ab, E, N	1.0×103 copies/mL (Maccura Nucleic Acid Extraction Kit), 5.0×102 copies/mL (QIAGEN QIAamp Viral RNA Mini Kit)	N/A	1 hour 15 mins	Upper respiratory specimens (such as oropharyngeal swabs, nasopharyngeal swabs, nasal swabs, and mid-turbinate swabs)	Applied Biosystems™ 7500 Real-Time PCR (software v2.3)	Positive for Orf1ab with or without E/N		https://www.fda.gov/media/137026/download
2020-08-04	DiaCarta, Inc	QuantiVirus™ SARS-CoV-2 Test Kit	Yes	H	Orf1ab, E, N	100 copies/mL (Orf1ab and N); 200 copies/mL for E (QuantStudio 5); 100 copies/mL (ABI 7500 Fast Dx)	600	2 hours	Nasal swabs, NP swabs, OP swabs and sputum	Thermo Fisher (ABI) QuantStudio 5 (Software v1.4), Thermo Fisher (ABI) 7500 Fast Dx (Software v1.4)	Positive for two or more of the target genes		https://www.fda.gov/media/136809/download
2020-07-04	InBios International, Inc	Smart Detect SARS-CoV-2 rRT-PCR Kit	Yes	H	Orf1ab, E, N	1.1×103 GE/mL (7500 Fast Dx Real-Time PCR), 8.6×102 GE/mL (CFX96 Touch Real-Time PCR Detection System)	N/A	1.5 hours	NP swab, anterior nasal swab and midturbinate nasal swab	Applied Biosystems™ 7500 Fast Dx Real-Time PCR (Software version 1.4), CFX96 Touch Real-Time PCR Detection System (Bio-Rad)( CFX Maestro Software)	Positive for two or more of the target genes		https://www.fda.gov/media/136786/download
2020-03-04	Co-Diagnostics, Inc.	LOGIX SMART™ COVID-19 TEST KIT	Yes	H	RdRp	4.29 copies/µL	N/A	1-1.5 hours	Lower respiratory tract fluids (e.g. BAL, sputum, tracheal aspirate), and upper respiratory tract fluids (e.g. NP and OP swabs)	CoDx Box (BioMolecular Systems), MIC qPCR Cycler (BioMolecular Systems), Eco 48 (PCRmax)	Positive for RdRp		https://www.fda.gov/media/136687/download
2020-03-04	ScienCell Research Laboratories	ScienCell™ SARS-CoV-2 Coronavirus Real-time RT-PCR (RT-qPCR) Detection Kit	Yes	H	N1, N2	100 copies/µL	540	1 hour	Nasal, NP and OP swabs and BAL	Roche LightCycler® 96 Real-Time PCR System (Software 1.01.01.0050)	Positive for one or both of the target genes		https://www.fda.gov/media/136691/download
2020-01-04	Ipsum Diagnostics, LLC	COV-19 IDx assay	No	H	N1	8.5 copies/µL	180000	1.5 hours	NP and OP swabs	Applied Biosystems QuantStudio12 Flex (QS12) (software version 1.2.2)	Positive for N1		https://www.fda.gov/media/136621/download
03/27/2020	Luminex Molecular Diagnostics, Inc.	NxTAG® CoV Extended Panel	Yes	H	Orf1ab, E, N	5×103 GCE/mL	5400	2.5 hours	NP swab	Luminex platform	Positive for one or more of the target genes		https://www.fda.gov/media/136500/download
03/26/2020	BGI Genomics Co. Ltd	Real-Time Fluorescent RT-PCR Kit for Detecting SARS-2019-nCoV	Yes	H	Orf1ab	150 copies/mL (throat swab), 100 copies/mL (BAL)	N/A	2 hours	Throat swabs and BAL fluid	Applied Biosystems™ Real time PCR system 7500 (software v2.0.5)	Positive for Orf1ab		https://www.fda.gov/media/136472/download
03/25/2020	Avellino Lab USA, Inc.	AvellinoCoV2 test	No	H	N1, N3	55 copies/µL	18000	N/A	NP and OP swabs	Applied Biosystems 7500 Fast Real-Time PCR System (Software version 2.3)	Positive for N1 with or without N3		https://www.fda.gov/media/136453/download
03/24/2020	PerkinElmer, Inc.	PerkinElmer® New Coronavirus Nucleic Acid Detection Kit	Yes	H	Orf1ab, N	9.307 copies/ mL (ORF1ab); 30.467 copies/mL (N)	180	N/A	NP and OP swabs and anterior nasal swab specimens	Applied BiosystemsTM 7500 Real-Time PCR System (software version 2.3)	Positive for one or both of the target genes		https://www.fda.gov/media/136410/download
03/20/2020	Primerdesign Ltd	Primerdesign Ltd COVID-19 genesig Real-Time PCR assay	Yes	H	Orf1ab	0.33 copies/µL	N/A	2 hours	NP and OP swab, BAL	Applied Biosystems® 7500 Real-Time PCR System (software version 2.3), Bio-Rad CFX Connect™ Real-Time PCR Detection System (Maestro™ software version 1.1) and Roche® LightCycler 480 II (software version 1.5)	Positive for Orf1ab		https://www.fda.gov/media/136823/download
03/17/2020	Quest Diagnostics Infectious Disease, Inc.	SARS-CoV-2 RNA Qualitative Real-Time RT-PCR	Yes	H	N1, N3	136 copies/mL	N/A	N/A	Upper and lower respiratory specimens (such as NP and OP swabs, sputum, tracheal aspirates, and BAL)	Applied BiosystemsTM 7500 Real-Time PCR System	Positive for both N1 and N3		https://www.fda.gov/media/136231/download
03/17/2020	Quidel Corp.	Lyra® SARS-CoV-2 Assay	Yes	H	pp1ab	8×10-1 RNA copies/µL	6000	2.5 hours	NP and OP swabs	Applied Biosystems 7500 Fast Dx (software version 1.4 ), Applied Biosystems 7500 Standard (software version 2.0.6), Roche LightCycler 480 ( software version 1.5.0.39), Qiagen Rotor-Gene Q (software version 2.0.2.4), Bio-Rad CFX96 Touch (software version 3.1), Thermofisher QuantStudio 7 Pro (software version 2.0)	Positive for pp1ab		https://www.fda.gov/media/136820/download
03/16/2020	Laboratory Corporation of America	COVID-19 RT-PCR TEST	No	H	N1, N2, N3	6.25 copies/µL (NP), 12.5 copies/µL (BAL)	18000	N/A	Upper and lower respiratory specimens (such as NP and OP swabs, sputum, lower respiratory tract aspirates, BAL, and NP wash/aspirate or nasal aspirate)	Applied Biosystems QuantStudio7 Flex (QS7) (software version 1.3)	Positive for all three target genes		https://www.fda.gov/media/136151/download
03/13/2020	Thermo Fisher Scientific, Inc.	TaqPath™ COVID-19 Combo Kit	Yes	H	Orf1ab, S, N	10 GCE/ reaction	180000	3 hours	Upper respiratory specimens (such as NP, OP, nasal, and mid-turbinate swabs, and NP aspirate) and BAL specimens	Applied Biosystems™ 7500 Fast Dx Real-Time PCR ( Software v1.4.1), Applied Biosystems™ 7500 Fast Real‑Time PCR Instrument (Software v1.5.1 or v2.3), Applied Biosystems™ 7500 Real‑Time PCR Instrument (Software v2.3), Applied Biosystems™ QuantStudio™ 5 Real‑Time PCR (Software v1.5.1), Applied Biosystems™ QuantStudio™ 7 Flex Real-Time PCR (Software v1.3)	Positive for two or more of the target genes		https://www.fda.gov/media/136112/download
02/29/2020	Wadsworth Center, NYSDOH	New York SARS-CoV-2 Real-time Reverse Transcriptase (RT)-PCR Diagnostic Panel	Yes	H	N1, N2	25 GC/ reaction	N/A	N/A	NP, OP swabs and sputa	Applied Biosystems® 7500 Fast Dx Real-Time PCR (Software version 1.4)	Positive for both N1 and N2		https://www.fda.gov/media/135847/download
2020-04-02	Centers for Disease Control and Prevention's (CDC)	CDC 2019-Novel Coronavirus (2019-nCoV) Real-Time RT-PCR Diagnostic Panel	Yes	H	N1, N2	100 RNA copies/µL (Qiagen DSP); 100.5 RNA copies/µL (Qiagen EZ1)	18000	3 hours	Upper and lower respiratory specimens (such as NP and OP swabs, sputum, lower respiratory tract aspirates, BAL, and NP wash/aspirate or nasal aspirate)	Applied Biosystems 7500 Fast Dx Real-Time PCR Instrument (Software v1.4)	Positive for both N1 and N2		https://www.fda.gov/media/134922/download
Real-time RT-PCR for Use on Automated Sample-to-result System
2020-02-10	BioFire Diagnostics, LLC	BioFire Respiratory Panel 2.1-EZ (RP2.1-EZ)	Yes	H, M, W	S, M	5×102 copies/mL	N/A	N/A	NP swab	BioFire® FilmArray® System instrument module	Positive for one or both of the target genes		https://www.fda.gov/media/142696/download
09/24/2020	Cepheid	Xpert Xpress SARS-CoV-2/Flu/RSV	Yes	H, M, W	E, N2	131 copies/mL	N/A	2-4 hours	NP swab, nasal swab or nasal wash/ aspirate specimens	GeneXpert Dx, GeneXpert Infinity and/or GeneXpert Xpress systems	Positive for SARS-CoV-2 channel		https://www.fda.gov/media/142437/download
2020-04-09	Roche Molecular Systems, Inc.	cobas SARS-CoV-2 & Influenza A/B Nucleic Acid Test for use on the cobas Liat System	Yes	H, M, W	Orf1a/b, E	12 copies/mL	N/A	2-4 hours	NP and nasal swabs	cobas® Liat® System	Positive for Orf1a/b with or without E		https://www.fda.gov/media/142193/download
2020-03-09	Roche Molecular Systems, Inc.	cobas SARS-CoV-2 & Influenza A/B	Yes	H, M	Orf1a/b, E	0.12 TCID50/mL	1800	2-4 hours	Nasal and NP swab specimens	cobas® 6800 System and cobas® 8800 System	Positive for Orf1a/b with or without E	E gene is specific for pan-Sarbecovirus	https://www.fda.gov/media/141887/download
08/31/2020	BayCare Laboratories, LLC	BayCare SARS-CoV-2 RT PCR Assay	No	H	ORF1, E	0.007 TCID50/mL	N/A	2-4 hours	NP swabs	cobas 6800/8800 Systems with cobas 6800/8800 Systems Software v1.2 (ASAP v10.1.0) and v1.3 (ASAP v11.1.0)	Positive for one or both of the target genes		https://www.fda.gov/media/141769/download
06/13/2020	Kaiser Permanente Mid-Atlantic States	KPMAS COVID-19 Test	No	H	Orf1ab, E	0.007 TCID50/mL (Orf1ab); 0.004 TCID50/mL €	N/A	3 hours	Nasal swab	cobas® 6800/8800 Systems	Positive for both Orf1ab and E		https://www.fda.gov/media/139067/download
07/31/2020	University of California San Diego Health	UCSD RC SARS-CoV-2 Assay	No	H	Orf1ab, E	0.007 TCID50/mL (Orf1ab); 0.004 TCID50/mL €	N/A	2 hours	Nasal swab specimens and upper respiratory specimens (NP, mid-turbinate, anterior nares or OP swab specimens)	cobas 6800/8800 Systems with cobas 6800/8800 Systems Software v1.2 (ASAP v10.1.0) and v1.3 (ASAP v11.1.0)	Positive for one or both of the target genes		https://www.fda.gov/media/140712/download
07/15/2020	Quest Diagnostics Infectious Disease, Inc.	Quest Diagnostics PF SARS-CoV-2 Assay	No	H	2 regions of Orf1ab	1×10-2 TCID50/mL	N/A	N/A	Nasal swab	Panther Fusion® System	Positive for SARS-CoV-2 ROX channel		https://www.fda.gov/media/140229/download
07/15/2020	Quest Diagnostics Infectious Disease, Inc.	Quest Diagnostics RC SARS-CoV-2 Assay	No	H	Orf1ab, E	0.007 TCID50/mL (Orf1ab); 0.004 TCID50/mL €	N/A	Unavailable	Nasal swab	cobas® 6800/8800 Systems	Positive for both Orf1ab and E		https://www.fda.gov/media/140234/download
06/17/2020	Omnipathology Solutions Medical Corporation	Omni COVID-19 Assay by RT-PCR	No	H	N1, N2	1.23 copies/µL	N/A	45 minutes	NP swab, OP swab, anterior nasal swab, mid-turbinate nasal swab, NP wash/aspirate, nasal aspirate, and BAL specimens	BD MAX System	Positive for SARS-CoV-2 channel	The detection of SARS-CoV-2 RNA is performed using two target regions, which are both detected in the same fluorescence channel	https://www.fda.gov/media/139292/download
2020-11-05	Abbott Molecular Inc.	Alinity m SARS-CoV-2 assay	Yes	H, M	N, RdRp	100 virus copies/mL	N/A	<2 hours	Nasal swabs, NP and OP swabs and BAL	Alinity m System	Positive for SARS-CoV-2 channel	The two SARS-CoV-2-specific probes are labeled with the same fluorophore	https://www.fda.gov/media/137979/download
2020-01-05	BioFire Diagnostics, LLC	BioFire Respiratory Panel 2.1 (RP2.1)	Yes	H, M	S, M	5.0×102 copies/mL	N/A	45 minutes	NP swab	BioFire® FilmArray® System instrument module	Positive for one or both of the target genes		https://www.fda.gov/media/137583/download
2020-08-04	Becton, Dickinson & Company (BD)	BD SARS-CoV-2Reagents for BD MAX System	Yes	H, M	N1, N2	40 GE/mL	5400	N/A	NP, nasal, mid-turbinate, and OP swab specimens, NP wash/aspirate or nasal aspirates	BD MAX System	Positive for one or both of the target genes		https://www.fda.gov/media/136816/download
2020-03-04	Luminex Corporation	ARIES® SARS-CoV-2 Assay	Yes	H, M	Orf1ab, N	3.33×102 GCE/mL	180000	4 hours	NP swab	ARIES instrument	Positive for one or both of the target genes		https://www.fda.gov/media/136693/download
2020-02-04	Becton, Dickinson & Company (BD)	BioGX SARS-CoV-2 Reagents for BD MAX™ System	Yes	H, M	N1, N2	40 GE/mL	1800	3 hours	NP, nasal, mid-turbinate, and OP swab specimens, nasopharyngeal wash/aspirate or nasal aspirates	BD MAX System	Positive for one or both of the target genes		https://www.fda.gov/media/136653/download
03/30/2020	QIAGEN GmbH	QIAstat-Dx® Respiratory SARS-CoV-2 Panel	Yes	H, M	Orf1b, E	500 copies/mL	180000	N/A	NP swab	QIAstat-Dx Analyzer 1.0	Positive for SARS-CoV-2 channel	The two SARS-CoV-2-specific probes are labeled with the same fluorophore	https://www.fda.gov/media/136571/download
03/30/2020	NeuMoDx Molecular, Inc.	NeuMoDx™ SARS-CoV-2 Assay	Yes	H, M	N, Nsp2	150 copies/mL	5400	N/A	Nasal, NP and OP swabs, and BAL specimens	NeuMoDx Molecular System	Positive for one or both of the target genes		https://www.fda.gov/media/136565/download
03/23/2020	BioFire Defense, LLC	BioFire® COVID-19 Test	Yes	H, M	2 regions of Orf1ab, Orf8	3.3×102 GC/mL	5400	45 minutes	NP swab	FilmArray® 2.0 or FilmArray® Torch systems	Positive for two or more of the target genes		https://www.fda.gov/media/136353/download
03/20/2020	Cepheid	Xpert® Xpress SARS-CoV-2	Yes	H, M, W	E, N2	0.02 PFU/mL	5400	45 minutes	Upper respiratory specimens (such as NP, OP, nasal, or mid-turbinate swab and/or nasal wash/ aspirate)	GeneXpert Dx and GeneXpert Infinity systems	Positive for N2 wth or without E		https://www.fda.gov/media/136314/download
03/19/2020	DiaSorin Molecular LLC	Simplexa™ COVID-19 Direct	Yes	H, M	Orf1ab, S	500 copies/mL	6000	1 hour	NP swabs, nasal swabs, nasal wash/aspirate or BAL specimens	LIAISON® MDX	Positive for one or both of the target genes		https://www.fda.gov/media/136286/download
03/18/2020	Abbott Diagnostics Scarborough, Inc.	Abbott RealTime SARS-CoV-2	Yes	H	N, RdRp	100 virus copies/mL	5400	24 hours (high volume throughout)	Nasal, NP and OP swabs, and BAL	Abbott m2000 System	Positive for SARS-CoV-2 channel	The two SARS-CoV-2-specific probes are labeled with the same fluorophore	https://www.fda.gov/media/136258/download
03/16/2020	Hologic, Inc.	Panther Fusion SARS-CoV-2 Assay	Yes	H	2 regions of Orf1ab	1×10-2 TCID50/mL	600	3.5 hours	Upper respiratory specimens (such as NP, nasal, mid-turbinate, and OP swab specimens, NPwash/aspirates or nasal wash), and lower respiratory tract (LRT) specimens (such as BAL)	Panther Fusion® System	Positive for SARS-CoV-2 ROX channel	The two SARS-CoV-2-specific probes are labeled with the same fluorophore ROX	https://www.fda.gov/media/136156/download
2020-12-03	Roche Molecular Systems, Inc. (RMS)	cobas® SARS-CoV-2	Yes	H, M	Orf1ab, E	0.007 TCID50/mL (Orf1ab); 0.004 TCID50/mL €	1800	3 hours	Nasal, NP and OP swabs	cobas® 6800/8800 Systems	Positive for both Orf1ab and E		https://www.fda.gov/media/136049/download
Endpoint RT-PCR
Lateral Flow Detection
03/23/2020	Mesa Biotech Inc.	Accula SARS-Cov-2 Test	Yes	H, M, W	N	200 copies/reaction	N/A	30 minutes	Nasal or nasal mid-turbinate swab specimens	Accula™ Dock or Silaris™ Dock	Positive for N		https://www.fda.gov/media/136355/download
Enzyme-based Colorimetric Detection
09/16/2020	Visby Medical, Inc.	Visby Medical COVID-19	Yes	H, M	N	1112 GC/mL	N/A	2-4 hours	NP, nasal, or mid-turbinate swabs	Instrument-free	Positive for N		https://www.fda.gov/media/142228/download
04/29/2020	Rheonix, Inc.	Rheonix COVID-19 MDx Assay	Yes	H	N1	625 GE/mL	1800	<5 hours	NP swabs, OP swabs, anterior nasal swabs, mid-turbinate nasal swabs, nasal washes, nasal aspirates and BAL fluid	Rheonix Encompass MDx® Workstation	Positive for N1		https://www.fda.gov/media/137489/download
Fluorescence Detection
09/30/2020	Alimetrix, Inc.	Alimetrix SARS-CoV-2 RT-PCR Assay	No	H	Orf1ab, N1, N2	250 copies/mL (Zymo Research Quick-DNA/RNA Viral MagBead Extraction); 1000 copies/mL (Qiagen QIAamp 96 Virus QIAcube HT Kit)	N/A	2-4 hours	NP, OP, anterior nasal and mid-turbinate nasal swab specimens, as well as NP washes/aspirates or nasal aspirates and BAL specimens	Applied Biosystems GeneAmp 9700 Thermal Cycler with software version 3.12, Sensovation Sensopot microarray scanner with ArrayReader software version 3.1.0.15245	Positive for one or more of the target genes		https://www.fda.gov/media/142592/download
08/28/2020	DxTerity Diagnostics, Inc.	DxTerity SARS-CoV-2 RT PCR CE Test	No	H	Orf1ab, E, N	50 copies/mL	N/A	N/A	Saliva specimens	VeritiDx PCR Thermal Cycler, ThermoFisher ABI 3500xL Dx Genetic Analyzer (K191030)	Positive for two or more of the target genes		https://www.fda.gov/media/141669/download
08/25/2020	QDx Pathology Services	QDX SARS-CoV-2 Assay	No	H	N1, N2	1000 copies/mL (Applied Biosystems 7500 Fast and the Applied Biosystems Quant Studio 7 systems), 250 copies/mL (Applied Biosystems Quant Studio 12K system)	N/A	N/A	Nasal swab	Applied Biosystems™ QuantStudio™ 7 Flex (Software Version 1.3), Applied Biosystems™ 7500 Fast (Software Version 2.3), Applied Biosystems™ QuantStudio™ 12K Flex (Software Version 1.3)	Positive for N1 and N2		https://www.fda.gov/media/141545/download
06/25/2020	PlexBio Co., Ltd.	IntelliPlex SARS-CoV-2 Detection Kit	Yes	H	E, N, RdRP	140 copies/mL	N/A	N/A	NP, OP, anterior nasal and mid-turbinate nasal swabs, NP wash/aspirate or nasal aspirates, and BAL specimens	IntelliPlex 1000 πCode Processor and PlexBio 100 Fluorescent Analyzer with DeXipher software	Positive for one or more of the target genes		https://www.fda.gov/media/139527/download
06/15/2020	Applied BioCode, Inc.	BioCode SARS-CoV-2 Assay	Yes	H	2 regions in N gene	1.72×10-2 TCID50/mL	5400	N/A	Upper respiratory specimens (such as NP swabs, OP swabs, and nasal swabs) or BAL	BioCode® MDx-3000	Positive for one or both of the target genes		https://www.fda.gov/media/139049/download
2020-09-06	ChromaCode Inc.	HDPCR SARS-CoV-2 Assay	Yes	H	N1, N2	1000 copies/mL (Applied Biosystems 7500 Fast and the Applied Biosystems Quant Studio 7 systems), 250 copies/mL (Applied Biosystems Quant Studio 12K system)	5400	<1.5 hours	NP swabs, OP swabs, anterior nasal swabs, mid-turbinate nasal swabs as well as nasal aspirate, nasal wash, and BAL specimens	Applied Biosystems™ QuantStudio™ 7 Flex (Software Version 1.3), Applied Biosystems™ 7500 Fast (Software Version 2.3), Applied Biosystems™ QuantStudio™ 12K Flex (Software Version 1.3)	Positive for N1 and N2		https://www.fda.gov/media/138786/download
Electrochemical detection
2020-07-10	GenMark Diagnostics, Inc.	ePlex Respiratory Pathogen Panel 2	Yes	H, M	NR	250 GC/mL	N/A	2-4 hours	NP swab	ePlex	Positive for the target gene		https://www.fda.gov/media/142905/download
03/19/2020	GenMark Diagnostics, Inc.	ePlex®SARS-CoV-2 Test	Yes	H, M	NR	750 GC/mL	N/A	<2 hours	NP swab	ePlex	Positive for the target gene		https://www.fda.gov/media/136282/download
Magnetic Resonance Detection
08/31/2020	T2 Biosystems, Inc.	T2SARS-CoV-2 Panel	Yes	H, M	NR	2000 GE/mL	N/A	N/A	Upper respiratory specimens (such as nasal, mid-turbinate, NP, and OP swab specimens) and BAL specimens	T2Dx Instrument (T2Dx)	Positive for the target gene		https://www.fda.gov/media/141755/download
MALDI-TOF Detection
10/26/2020	Agena Bioscience, Inc.	MassARRAY SARS-CoV-2 Panel	Yes	H	Orf1ab, N1, N2, N3, ORF1	2.5 copies/μl	N/A	N/A	Upper respiratory specimens (NP swab, OP swab, nasal and mid-turbinate swabs, and nasal and NP aspirate) and BAL	MassARRAY System with Typer Software	Positive for two or more of the target genes		https://www.fda.gov/media/143334/download
09/29/2020	National Jewish Health	SARS-CoV-2 MassArray Test	No	H	Orf1ab, N1, N2, N3, ORF1	0.69 copies/µL	5400	2-4 hours	Upper respiratory specimens (such as nasal, mid-turbinate, NP, and OP swabs and nasal/NP aspirate and wash specimens) and BAL specimens	Thermo Fisher Veriti thermal cycler, MassARRAY System with SpectroACQUIRE software v4.3.145 and v.5.0	Positive for two or more of the target genes		https://www.fda.gov/media/142548/download
2020-03-08	Ethos Laboratories	Ethos Laboratories SARS-CoV-2 MALDI-TOF Assay	No	H	Orf1ab, N1, N2, N3, ORF1	1 TCID50/mL	5400	2-4 hours	Upper respiratory specimens (such as nasal, mid-turbinate, NP and OP swab specimens) and BAL specimens	Veriti 96 Thermal Cycler with Thermal Cycler Fleet Control Software Version 1.7.1 (Applied Biosystems, California, USA), MassARRAY System with Typer Software, Version 5.0	Positive for two or more of the target genes		https://www.fda.gov/media/140780/download
RT-Digital PCR
06/25/2020	PreciGenome LLC	FastPlex Triplex SARS-CoV-2 detection kit (RT-Digital PCR)	Yes	H	Orf1ab, N	571.4 copies/mL	180000	~1-2 hours	OP swabs	DropX-2000 Sample Prep Station and Drop-X 2000 DScanner	Positive for one or both of the target genes		https://www.fda.gov/media/139523/download
2020-06-04	Gnomegen LLC	Gnomegen COVID-19 RT-Digital PCR Detection Kit	Yes	H	N1, N2	8 GC/reaction	N/A	N/A	Nasal, NP and OP swab	QuantStudio™ 3D Digital PCR System	Positive for SARS-CoV-2 FAM channel	The two SARS-CoV-2-specific probes are labeled with the same fluorophore FAM	https://www.fda.gov/media/136738/download
2020-01-05	Bio-Rad Laboratories, Inc	Bio-Rad SARS-CoV-2 ddPCR Test	Yes	H	N1, N2	150 copies/mL	600	45 minutes	NP, anterior nasal and mid-turbinate nasal swab specimens as well as NP wash/aspirate and nasal aspirate specimens	QX200/QXDx Automated Droplet Generator, Bio-Rad C1000 Touch or S1000 Thermocyclers and QX200/QXDx Droplet Reader	Positive for one or both of the target genes		https://www.fda.gov/media/137579/download
qSTAR
10/14/2020	LumiraDx UK Ltd.	LumiraDx SARS-CoV-2 RNA STAR Complete	Yes	H	Orf1a	7500 copies/mL	N/A	12 minutes	Upper respiratory specimens (such as nasal, mid-turbinate, NP and OP swabs)	Roche LightCycler 480 II (software version SW 1.5.1), Applied Biosystems 7500 Fast Dx (software version 1.4.1), Applied Biosystems QuantStudio 5 (software version 1.5.1), Agilent AriaMx (software version 1.71), or the Agilent Stratagene Mx3005P (software version 4.10) RT-PCR Instruments	Positive for Orf1a		https://www.fda.gov/media/143062/download
2020-11-08	LumiraDx UK Ltd.	LumiraDx SARS-CoV-2 RNA STAR	Yes	H	Orf1a	500 copies/mL	N/A	N/A	Upper respiratory specimens (such as nasal, midturbinate, NP and OP swabs) and BAL specimens	Roche LightCycler 480 II (software version SW 1.5.1), Applied Biosystems 7500 Fast Dx (software version 1.4.1), Applied Biosystems QuantStudio 5 (software version 1.5.1), Agilent AriaMx (software version 1.71), or the Agilent Stratagene Mx3005P (software version 4.10) RT-PCR Instruments	Positive for Orf1a		https://www.fda.gov/media/141057/download
Isothermal Nucleic Acid Amplification
2020-10-06	Cue Health Inc.	Cue COVID-19 Test	Yes	H, M, W	N	1.3 GC/µL	N/A	25 minutes	Direct nasal swab or nasal specimens	Cue Health Monitoring System, Apple® iPhone® 8+ or later mobile smart device with iOS 13 or later with Bluetooth and Wi- Fi	Postiitve for N		https://www.fda.gov/media/138826/download
Fluorescence Detection
2020-05-10	SEASUN BIOMATERIALS, Inc.	AQ-TOP COVID-19 Rapid Detection Kit PLUS	Yes	H	Orf1ab, N	1 copy/µL	N/A	N/A	Upper respiratory specimens including OP and NP swabs, anterior nasal and mid-turbinate nasal swabs, NP washes/aspirates or nasal aspirates as well as BAL specimens	CFX 96 real-time PCR detection system with software CFX manager V3.1, Applied Biosystems real-time PCR system 7500 with Software 2.0.6	Positive for one or both target geens		https://www.fda.gov/media/142800/download
08/13/2020	Pro-Lab Diagnostics	Pro-AmpRT SARS-CoV-2 Test	No	H	Orf1ab	125 GE/swab	N/A	2.5 hours	Upper respiratory specimens (such as nasal, NP and OP swab specimens)	Genie HT instrument (Software version v4.00rc2)	Positive for Orf1ab		https://www.fda.gov/media/141149/download
05/21/2020	Seasun Biomaterials, Inc.	AQ-TOP COVID-19 Rapid Detection Kit	Yes	H	Orf1ab	7 copies/ µL	6000	15-30 minutes	Upper and lower respiratory specimens including OP and NP swab specimens, anterior nasal and mid-turbinate nasal swabs, NP wash/aspirate or nasal aspirate specimens, BAL and sputum	CFX 96 real-time PCR detection system (Bio-Rad) (Software CFX manager V3.1) and ABI 7500 realtime PCR platforms (Software 2.0.6)	Positive for Orf1ab		https://www.fda.gov/media/138307/download
Colorimetric Detection
2020-01-09	Detectachem Inc.	MobileDetect Bio BCC19 (MD-Bio BCC19) Test Kit	Yes	H, M	E, N	75 copies/µL	N/A	4-6 hours	NP, OP, mid-turbinate (MT) and anterior nares (nasal) swab specimens	MD-Bio BCC19 Heater	positive for one or both of the target genes		https://www.fda.gov/media/141791/download
05/18/2020	Color Genomics, Inc.	Color Genomics SARS-CoV-2 RT-LAMP Diagnostic Assay	No	H	Orf1ab, E, N	0.75 copies/µL	18000	N/A	NP swabs, OP swabs, anterior nares swabs, mid-turbinate nasal swabs, NP washes/aspirates or nasal aspirates, as well as BAL specimens	Biotek NEO microplate	Positive for all the three target genes		https://www.fda.gov/media/138249/download
CRISPR-based Detection
08/31/2020	Mammoth Biosciences, Inc.	SARS-CoV-2 DETECTR Reagent Kit	Yes	H	N	20 copies/µL	N/A	2-4 hours	Upper respiratory specimens (NP swabs, OP swabs, mid-turbinate nasal swabs, anterior nasal swabs, NP wash/aspirate or nasal aspirate)	ABI 7500 Fast Dx Real-Time PCR system	Positive for N		https://www.fda.gov/media/141765/download
2020-09-07	UCSF Health Clinical Laboratories, UCSF Clinical Labs at China Basin	SARS-CoV-2 RNA DETECTR Assay	No	H	N	20 copies/µL	N/A	N/A	Upper respiratory specimens (such as nasal swabs, NP swabs, OP swabs, NP wash/aspirate or nasal aspirate) and BAL specimens	ABI 7500 Fast Dx instrument (Applied Biosciences) (Software Version 1.4.1)	Postive for N		https://www.fda.gov/media/139937/download
2020-06-05	Sherlock BioSciences, Inc.	Sherlock CRISPR SARS-CoV-2 Kit	Yes	H	Orf1ab, N	6.75 copies/µL (Orf1ab); 1.35 copies/µL (N)	6000	1 hour	Upper respiratory specimens (such as nasal swabs, NP swabs, OP swabs, NP wash/aspirate or nasal aspirate) and BAL specimens	BioTek Plate Reader running Gen5 3.08 software	Positive for one or both of the target genes		https://www.fda.gov/media/137746/download
NEAR
03/27/2020	Abbott Diagnostics Scarborough, Inc.	ID NOW COVID-19	Yes	H, M, W	RdRp	125 GE/mL	300000	13 minutes	Nasal, NP or throat swabs	ID NOW Instrument	Positive for RdRp		https://www.fda.gov/media/136525/download
OMEGA
2020-10-04	Atila BioSystems, Inc.	iAMP COVID-19 Detection Kit	Yes	H	Orf1ab, N	10 copies/μL	N/A	N/A	Nasal, NP and OP swabs	CFX96 Real-Time System	Positive for SARS-CoV-2 FAM channel		https://www.fda.gov/media/136870/download
TMA
2020-03-08	Poplar Healthcare	Poplar SARS-CoV-2 TMA Pooling assay	No	H	2 regions of Orf1ab	83 copies/mL	N/A	N/A	Nasal, NP and OP swab specimens	Panther Fusion® system	Positive for SARS-CoV-2 channel		https://www.fda.gov/media/140792/download
07/15/2020	Quest Diagnostics Infectious Disease, Inc.	Quest Diagnostics HA SARS-CoV-2 Assay	No	H	2 regions of Orf1ab	83 copies/mL	N/A	N/A	Nasal swab	Panther Fusion® system	Positive for SARS-CoV-2 channel		https://www.fda.gov/media/140239/download
05/28/2020	PrivaPath Diagnostics, Inc.	LetsGetChecked Coronavirus (COVID-19) Test	No	H	2 regions of Orf1ab	83 copies/mL	720	N/A	Nasal swab	Panther Fusion® system	Positive for SARS-CoV-2 channel		https://www.fda.gov/media/138406/download
05/14/2020	Hologic, Inc.	Aptima SARS-CoV-2 assay	Yes	H	2 regions of Orf1ab	83 copies/mL	600	2.4 hours	NP, nasal, mid-turbinate and OP swab specimens, nasopharyngeal wash/aspirate or nasal aspirates	Panther Fusion® system	Positive for SARS-CoV-2 channel		https://www.fda.gov/media/138096/download
Sequencing
Sanger Sequencing
2020-04-09	BillionToOne, Inc.	qSanger-COVID-19 Assay	Yes	H	N	3200 copies/mL	N/A	2-4 hours	Upper respiratory swab specimens (such as nasal swab, mid-turbinate swab, NP swab, and OP swab specimens)	Thermal cycler (e.g. Applied Biosystems Veriti Thermal Cycler) and Sanger sequencing instrument (e.g. Applied Biosystems 3730xl DNA Analyzer)	Positive for N		https://www.fda.gov/media/141935/download
NGS
2020-06-10	University of California, Los Angeles (UCLA	UCLA SwabSeq COVID-19 Diagnostic Platform	No	H	S2	250 GCE/mL	N/A	N/A	Upper respiratory specimens (NP swabs, OP swab, midturbinate nasal swabs and anterior nasal swabs)	Veriti 384-Well Thermal Cycler, Illumina MiSeq sequencer	S2/S2 spike ratio > 0.003		https://www.fda.gov/media/142805/download
09/23/2020	Clear Labs, Inc.	Clear Dx SARS-CoV-2 Test	Yes	H	21 target genes	2000 copies/mL	N/A	2-4 hours	NP swab, OP swab, anterior nasal swab, midturbinate swab, NP wash/aspirate, nasal aspirate, and BAL specimens	Clear Dx™ system including Hamilton STAR robotic platform and Oxford Nanopore GridION Sequencer	Alogorithm		https://www.fda.gov/media/142418/download
08/21/2020	Guardant Health, Inc.	Guardant-19	No	H	N1	125 copies/mL	N/A	2-4 hours	NP swabs, OP swabs, nasal swabs, anterior nasal swabs, mid-turbinate nasal swabs, NP wash/aspirates, nasal aspirates, and nasal washes	Illumina NextSeq 500 and NextSeq 550 Sequencing Systems	Positive for N1		https://www.fda.gov/media/141487/download
2020-06-08	Helix OpCo LLC (dba Helix)	Helix COVID-19 NGS Test	No	H	S	125 GCE/mL	N/A	2-4 hours	Upper respiratory specimens (NP swabs, OP swab, midturbinate nasal swabs and anterior nasal swabs)	NovaSeq 6000 Sequencing System	Positive for S		https://www.fda.gov/media/140917/download
2020-09-06	Illumina, Inc.	Illumina COVIDSeq Test	Yes	H	98 targets	1000 copies/mL	5400	N/A	NP swabs, OP swabs, anterior nasal swabs, mid-turbinate nasal swabs, NP wash/aspirates, nasal aspirates, and BAL specimens	NovaSeq 6000 Sequencing System, NextSeq 500 Sequencing System, NextSeq 550 Sequencing System, or NextSeq 550Dx Instrument	At least 90 SARS-CoV-2 virus targets detected		https://www.fda.gov/media/138776/download
NDU, NAAT Detectable Units; GE, genomic equivalents; GC, genomic copies; GCE, genomic copy equivalents; PFU, plaque forming units; NP, nasopharyngeal; OP, oropharyngeal; N/A, not available.
*https://www.fda.gov/medical-devices/coronavirus-covid-19-and-medical-devices/sars-cov-2-reference-panel-comparative-data (Accessed on 7 Nov 2020)
**https://ifh.rutgers.edu/covid-test/ (Accessed on 7 Nov 2020)
